# Supplementary material
Source: publisher site journal article supplement (https://www.dovepress.com/get_supplementary_file.php?f=440405.docx)
Supplement: Supplementary file 1 [file get_supplementary_file.php]

**Table S1 Histopathological Summary of Study Animals.**

| **Group** | 1 | | 2 | | 3 | | 4 | | 5 |
| --- | --- | --- | --- | --- | --- | --- | --- | --- | --- |
| α-PD-L1 | – | | + | | + | | + | | + |
| Au@SiO2 NPs | – | | + | | – | | + | | – |
| XR | – | | – | | + | | + | | – |
| **Hematoxylin and eosin (H&E) stains** | | | | | | | | | |
| Mitotic GL261 cells | 4 | 0 | | 4 | | 0 | | 4 | |
| Lysed GL261 cells | 0 | 2 | | 0 | | 3 | | 0 | |
| Inflammatory cell infiltration | 0 | 0 | | 0 | | 2 | | 0 | |
| Microgliosis (repair process) | 0 | 1 | | 0 | | 3 | | 0 | |
| Mitotic rate (per 400X) | >15 | 3-5 | | >15 | | 3-5 | | >15 | |
| **Immunohistochemistry (IHC) stains** | | | | | | | | | |
| PD1 | + | | + | | + | | + | | + |
| CD8 | – | | + | | – | | + | | – |
| CD4 | – | | – | | – | | + | | – |

+ = present, – = none;

severity grading: 0 = within normal limits, 1 = minimal, 2 = mild, 3 = moderate, 4 = severe.


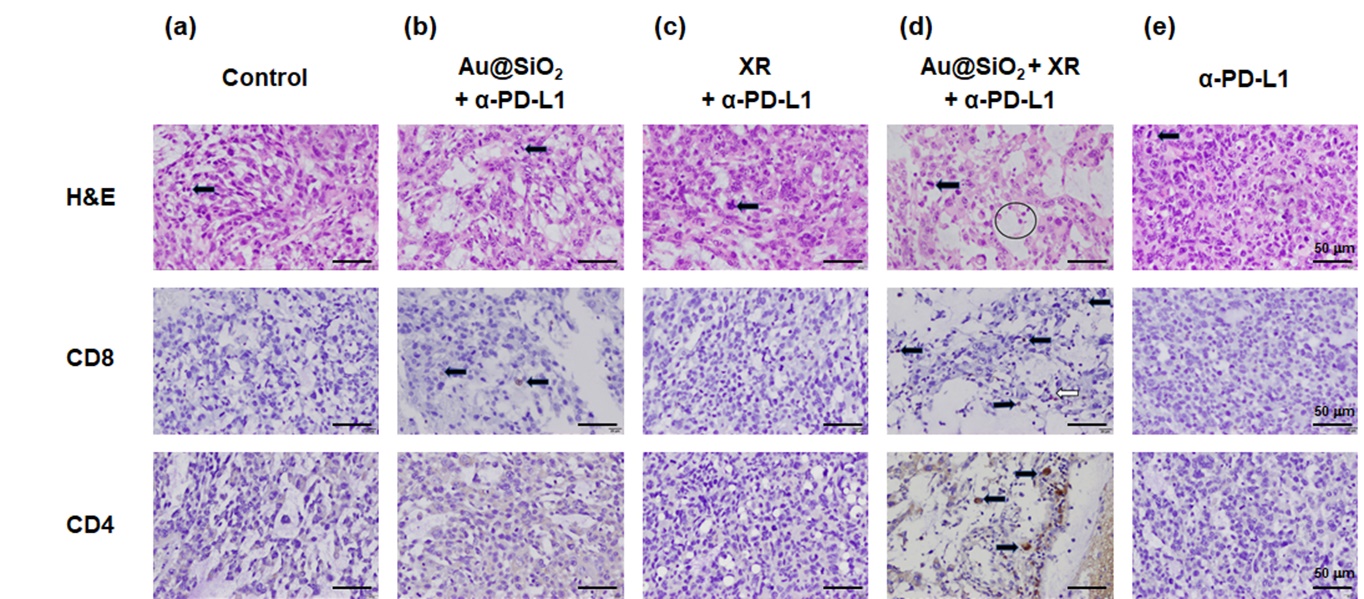


**Figure S1 Histopathological assessment of brain tissue obtained from mice receiving different treatments.** (a) Control; (b) Au@SiO2 NPs + α-PD-L1; (c) XR+ α-PD-L1; (d) Au@SiO2 NPs + XR + α-PD-L1; (e) α-PD-L1. α-PD-L1 at a dose of 10 mg/kg, Au@SiO2 NPs at a dose of 1 mg/kg, and X-ray irradiation (XR) with a single fraction of 6 MeV photons at a dose of 2 Gray. Rows depict H&E (first row), CD8 (second row), and CD4 stains (third row). Black arrows in each row signify tumor cells with mitotic features, CD8+ cells, and CD4+ cells, respectively. A black circle in the first row marks inflammatory cell infiltration, while a white arrow in the second row denotes Au@SiO2 NPs. Scale bar: 50 μm.


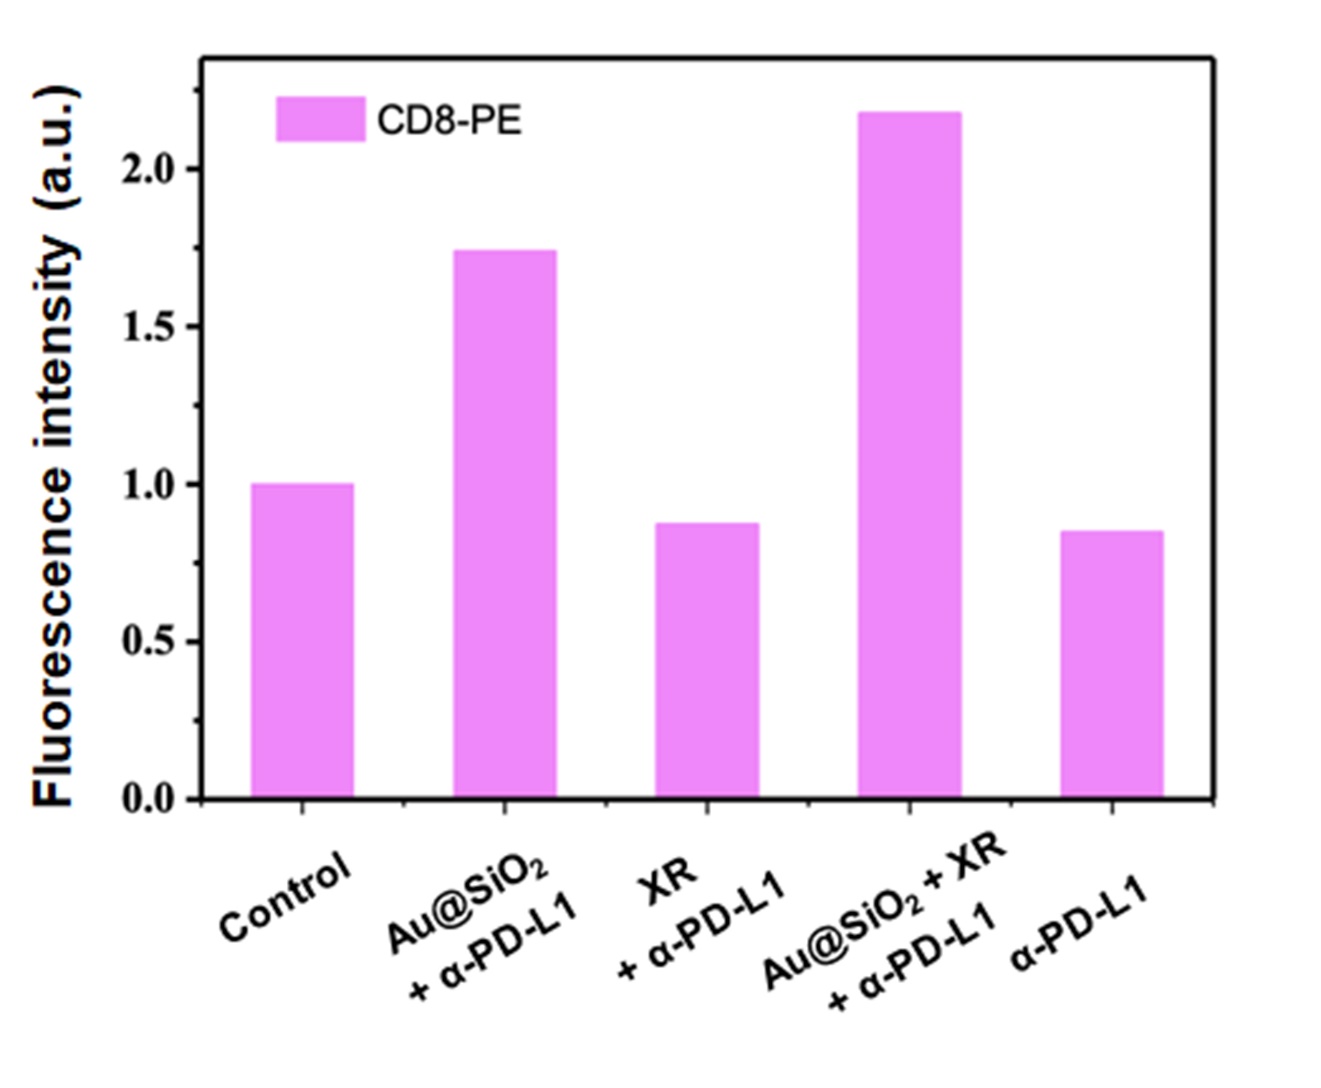


**Figure S2 Flow cytometry quantification of splenic CD8+ T Cells in mice receiving different treatments.** α-PD-L1 at a dose of 10 mg/kg, Au@SiO2 NPs at a dose of 1 mg/kg, and X-ray irradiation (XR) with a single fraction of 6 MeV photons at a dose of 2 Gray.
